# Supplementary material for: Ecological spillover of coffee-associated foliar fungi from field to forest as a biotic edge effect in the Neotropics
Source: Research Square preprint supplement (doi:10.21203/rs.3.rs-7781221/v1), 2025-10-28
Supplement: Supplementary file 1 [file 44b3e5a0900cda647269bf84.docx]

SUPPLEMETARY MATERIALS: EVIDENCE OF ECOLOGICAL SPILLOVER OF COFFEE-ASSOCIATED FOLIAR FUNGI FROM PLANTATION TO ADJACENT FOREST


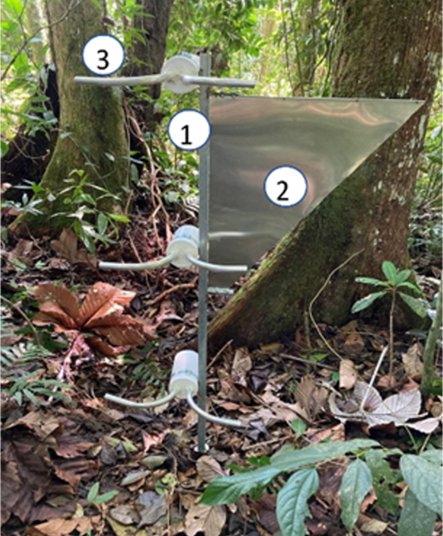


**Figure S1.** An example of Modified Wilson and Cook Samplers (MWACS) used in the study. (1) Illustrates how the wind sail (2) is oriented relative to the wind-facing intake tube (3) both mounted on a free-spinning mast-mounted pole.

| **Coffee Leaves** | | | **Forest Leaves** | | | | **Airborne samplers** | | | |
| --- | --- | --- | --- | --- | --- | --- | --- | --- | --- | --- |
| **Order** | **OTUs** | **total reads** | | **Order** | **OTUs** | **total reads** | | **Order** | **OTUs** | **total reads** | |
| unidentified | 1662 | 321706 | | unidentified | 3521 | 2400215 | | unidentified | 1024 | 629389 | |
| Pleosporales | 580 | 93765 | | Pleosporales | 932 | 621974 | | Hypocreales | 641 | 330989 | |
| Glomerellales | 83 | 35932 | | Chaetothyriales | 788 | 480099 | | Polyporales | 579 | 277062 | |
| Chaetothyriales | 385 | 25556 | | Tremellales | 208 | 228719 | | Agaricales | 921 | 186967 | |
| Agaricales | 297 | 19884 | | Hypocreales | 737 | 220091 | | Saccharomycetales | 90 | 184312 | |
| Erythrobasidiales | 26 | 15528 | | Agaricales | 657 | 204215 | | Pleosporales | 542 | 126177 | |
| Hypocreales | 295 | 12484 | | Glomerellales | 145 | 179245 | | Tremellales | 102 | 109283 | |
| Tremellales | 110 | 11034 | | Xylariales | 476 | 142047 | | Hymenochaetales | 301 | 100447 | |
| Mycosphaerellales | 56 | 11003 | | Trechisporales | 279 | 117626 | | Eurotiales | 76 | 99195 | |
| Capnodiales | 54 | 9356 | | Diaporthales | 123 | 110360 | | Trechisporales | 295 | 56627 | |
| Xylariales | 248 | 9346 | | Amphisphaeriales | 27 | 80689 | | Glomerellales | 70 | 46995 | |
| Amphisphaeriales | 22 | 5571 | | Orbiliales | 119 | 60901 | | Chaetothyriales | 310 | 38248 | |
| Diaporthales | 67 | 4302 | | Mycosphaerellales | 95 | 57595 | | Russulales | 146 | 28896 | |
| Sordariales | 34 | 2790 | | Helotiales | 128 | 46704 | | Auriculariales | 188 | 25559 | |
| Spiculogloeales | 6 | 2194 | | Capnodiales | 174 | 40511 | | Xylariales | 287 | 24623 | |
| Trechisporales | 125 | 2169 | | Exobasidiales | 12 | 30786 | | Coniochaetales | 7 | 23627 | |
| Phomatosporales | 12 | 1941 | | Polyporales | 185 | 24533 | | Mycosphaerellales | 65 | 21963 | |
| Trichosphaeriales | 19 | 1706 | | Eurotiales | 50 | 23229 | | Trichosporonales | 11 | 21690 | |
| Helotiales | 57 | 1565 | | Cantharellales | 103 | 22544 | | Exobasidiales | 17 | 12076 | |
| Dothideomycetes_IS | 5 | 1499 | | Hymenochaetales | 121 | 21413 | | Amphisphaeriales | 17 | 10121 | |
| Polyporales | 109 | 1460 | | Lecanorales | 84 | 17830 | | Sordariales | 48 | 8374 | |
| Cantharellales | 48 | 1250 | | Agaricostilbales | 39 | 16905 | | Sporidiobolales | 19 | 8130 | |
| Orbiliales | 33 | 1097 | | Saccharomycetales | 21 | 16887 | | Diaporthales | 72 | 7833 | |
| Hymenochaetales | 63 | 751 | | Botryosphaeriales | 25 | 15889 | | Capnodiales | 74 | 7398 | |
| Venturiales | 18 | 654 | | Cystofilobasidiales | 3 | 12054 | | Cantharellales | 97 | 6771 | |

**Table S1.** The number of OTUs and number of reads for the 25 most abundant fungal orders on leaves,and air samplers.

**Table S2.** Taxa captured in air samples that that were significantly more abundant in forest samplers the more closely they were related to coffee according to our GJAM model (Clark *et al.*, 2017; Fig. 4). The ‘lowest taxon’ indicates the lowest available taxonomic designation for each OTU when a closest matching genus was not possible.

| **otu_id** | **Effect Est.** | **SE** | **Order** | **Genus/lowest taxon** |
| --- | --- | --- | --- | --- |
| OTU63751 | -0.834 | 0.10 | Tremellales | unidentified |
| OTU41763 | -0.565 | 0.11 | Hypocreales | unidentified |
| OTU17663 | -0.377 | 0.10 | unidentified | unidentified |
| OTU51256 | -0.369 | 0.11 | unidentified | unidentified |
| OTU16868 | -0.358 | 0.10 | Agaricales | unidentified |
| OTU15029 | -0.328 | 0.11 | Cystobasidiales | *Occultifur* |
| OTU49031 | -0.326 | 0.10 | Pleosporales | *Periconia* |
| OTU67068 | -0.323 | 0.11 | Tremellales | *Hannaella* |
| OTU65542 | -0.322 | 0.11 | Tremellales | *Vishniacozyma* |
| OTU57830 | -0.316 | 0.11 | Pleosporales | *Neosetophoma =* |
| OTU47862 | -0.314 | 0.11 | Pleosporales | *Alternaria* |
| OTU53698 | -0.311 | 0.10 | Hypocreales | unidentified |
| OTU9668 | -0.307 | 0.10 | Agaricales | *Coprinellus* |
| OTU6549 | -0.306 | 0.11 | Ustilaginales | *Moesziomyces* |
| OTU53298 | -0.296 | 0.10 | Pleosporales | *Paraphaeosphaeria* |
| OTU39973 | -0.295 | 0.11 | Eurotiales | *Penicillium* |
| OTU54961 | -0.284 | 0.11 | Pleosporales | Didymosphaeriaceae |
| OTU5538 | -0.279 | 0.08 | Hypocreales | Hypocreales sp. |
| OTU16786 | -0.279 | 0.11 | Agaricales | *Ripartitella* |
| OTU10059 | -0.258 | 0.11 | Exobasidiales | *Meira* |
| OTU29536 | -0.255 | 0.12 | Hypocreales | *Simplicillium*. |
| OTU51376 | -0.252 | 0.10 | Pleosporales | unidentified |
| OTU58014 | -0.241 | 0.10 | Capnodiales | *Cladosporium* |
| OTU25405 | -0.226 | 0.09 | Hypocreales | *Thelonectria* |
| OTU51503 | -0.225 | 0.11 | Pleosporales | *Periconia* |
| OTU41042 | -0.223 | 0.08 | Chaetothyriales | *Cyphellophora* |
| OTU47506 | -0.220 | 0.11 | Eurotiales | *Penicillium* |
| OTU57907 | -0.220 | 0.10 | unidentified | Cladosporiaceae. |
| OTU18761 | -0.215 | 0.09 | Agaricales | *Coprinopsis* |
| OTU52630 | -0.211 | 0.10 | Pleosporales | Phaeosphaeriaceae |
| OTU60564 | -0.190 | 0.05 | unidentified | unidentified |
| OTU32517 | -0.183 | 0.09 | unidentified | unidentified |
| OTU46995 | -0.152 | 0.07 | Hypocreales | *Ovicillium* |

**Table S3.** Taxa of foliar fungi that that were significantly more abundant in forest samplers the closer they were to the coffee forest border according to our GJAM model (Clark *et al.*, 2017; Fig. 8). The ‘lowest taxon’ indicates the lowest available taxonomic designation for each OTU when a closest matching genus was not possible.

| **otu_id** | **Effect Est.** | | **SE** | | **Order** | | **Genus/lowest taxon** | |
| --- | --- | --- | --- | --- | --- | --- | --- | --- |
| OTU26796 | -0.368 | 0.17 | | Chaetothyriales | | *Cyphellophora* | |
| OTU58291 | -0.342 | 0.15 | | Sordariales | | Chaetomiaceae | |
| OTU50968 | -0.303 | 0.12 | | Pleosporales | | Pleosporales | |
| OTU60839 | -0.289 | 0.11 | | Mycosphaerellales | | *Pseudocercospora* | |
| OTU22895 | -0.282 | 0.15 | | Orbiliales | | *Lecophagus* | |
| OTU40557 | -0.275 | 0.10 | | unidentified | | unidentified | |
| OTU44774 | -0.273 | 0.14 | | unidentified | | unidentified | |
| OTU53372 | -0.268 | 0.13 | | Pleosporales | | *Setophoma* | |
| OTU57332 | -0.264 | 0.15 | | Helotiales | | Helotiales | |
| OTU53893 | -0.255 | 0.10 | | Pleosporales | | Pleosporales | |
| OTU39067 | -0.255 | 0.10 | | Amphisphaeriales | | *Pestalotiopsis* | |
| OTU53232 | -0.249 | 0.07 | | Pleosporales | | Didymellaceae | |
| OTU22070 | -0.225 | 0.11 | | Orbiliales | | Orbiliales | |
| OTU52567 | -0.209 | 0.10 | | Sordariales | | Sordariales | |
| OTU9668 | -0.204 | 0.07 | | Agaricales | | *Coprinellus* | |
| OTU32679 | -0.188 | 0.10 | | Tremellales | | *Papiliotrema* | |
| OTU55326 | -0.187 | 0.07 | | Pleosporales | | *Setophoma* | |
| OTU41870 | -0.185 | 0.10 | | Amphisphaeriales | | *Pestalotiopsis* | |
| OTU56681 | -0.153 | 0.08 | | unidentified | | Lecanoromycetes | |

**Table S4.** Taxa among the 1,000 most abundant OTUs in the coffee that were significantly more abundant on forest plants the more closely they were related to coffee according to our GJAM model (Clark *et al.*, 2017) (Fig 8). The ‘lowest taxon’ indicates the lowest available taxonomic designation for each OTU when a closest matching genus was not possible.

| **otu_id** | **Effect Est.** | **SE** | **Order** | **Genus/lowest taxon** |
| --- | --- | --- | --- | --- |
| OTU51335 | -0.569 | 0.16 | Glomerellales | *Colletotricum* |
| OTU48382 | -0.501 | 0.07 | Glomerellales | *Colletotrichum* |
| OTU29712 | -0.451 | 0.17 | Chaetothyriales | Trichomeriaceae |
| OTU48023 | -0.415 | 0.14 | Pleosporales | *Galiicola* |
| OTU39306 | -0.412 | 0.18 | Chaetothyriales | *Strelitziana* |
| OTU24069 | -0.404 | 0.15 | Chaetothyriales | Herpotrichiellaceae |
| OTU47101 | -0.400 | 0.15 | Chaetothyriales | *Cladophialophora* |
| OTU24159 | -0.389 | 0.17 | Hypocreales | *Xepicula* |
| OTU41027 | -0.383 | 0.14 | unidentified | unidentified |
| OTU50252 | -0.368 | 0.14 | Glomerellales | *Colletotrichum* |
| OTU38480 | -0.364 | 0.17 | Chaetothyriales | Cyphellophoraceae |
| OTU61431 | -0.349 | 0.15 | Mycosphaerellales | *Cercospora* |
| OTU44049 | -0.347 | 0.13 | Pleosporales | *Spegazzinia* |
| OTU33529 | -0.344 | 0.14 | unidentified | Sordariomycetes |
| OTU9523 | -0.341 | 0.12 | Agaricales | *Crepidotus* sp. |
| OTU44098 | -0.330 | 0.15 | unidentified | unidentified |
| OTU55212 | -0.324 | 0.11 | Pleosporales | *Setophoma* |
| OTU28589 | -0.322 | 0.15 | Orbiliales | *Dactylella* |
| OTU56681 | -0.322 | 0.08 | unidentified | Lecanoromycetes |
| OTU32178 | -0.319 | 0.14 | unidentified | Sordariomycetes |
| OTU50449 | -0.317 | 0.17 | Pleosporales | *Setophoma* |
| OTU48016 | -0.315 | 0.10 | Venturiales | Sympoventuriaceae |
| OTU36783 | -0.313 | 0.12 | Chaetothyriales | *Strelitziana* |
| OTU53232 | -0.305 | 0.07 | Pleosporales | Didymellaceae |
| OTU49862 | -0.301 | 0.14 | Pleosporales | Didymellaceae |
| OTU66135 | -0.301 | 0.14 | unidentified | Bulleribasidiaceae |
| OTU37043 | -0.300 | 0.11 | Chaetothyriales | *Strelitziana* |
| OTU15725 | -0.296 | 0.13 | Agaricales | *Arachnion* |
| OTU33504 | -0.295 | 0.12 | unidentified | unidentified |
| OTU58151 | -0.293 | 0.11 | Pleosporales | *Neosetophoma* |
| OTU55256 | -0.291 | 0.11 | unidentified | unidentified |
| OTU10838 | -0.290 | 0.12 | Erythrobasidiales | *Erythrobasidium* |
| OTU53194 | -0.289 | 0.12 | Sordariales | Podosporaceae |
| OTU16958 | -0.288 | 0.12 | unidentified | unidentified | |
| OTU47862 | -0.287 | 0.12 | Pleosporales | *Alternaria* | |
| OTU26787 | -0.287 | 0.14 | unidentified | unidentified | |
| OTU54978 | -0.286 | 0.11 | Xylariales | Bartaliniaceae | |
| OTU20521 | -0.285 | 0.10 | Orbiliales | Orbiliales | |
| OTU54126 | -0.284 | 0.08 | Pleosporales | Pleosporales | |
| OTU48011 | -0.283 | 0.12 | Amphisphaeriales | Pestalotiopsidaceae. | |
| OTU39590 | -0.282 | 0.11 | unidentified | Strelitzianaceae | |
| OTU67200 | -0.279 | 0.10 | unidentified | unidentified | |
| OTU13313 | -0.278 | 0.12 | Agaricales | *Psilocybe* | |
| OTU57184 | -0.275 | 0.07 | Pleosporales | *Phaeosphaeria* | |
| OTU34633 | -0.275 | 0.11 | Chaetothyriales | Trichomeriaceae | |
| OTU11831 | -0.274 | 0.13 | unidentified | Tremellomycetes | |
| OTU57306 | -0.270 | 0.10 | Pleosporales | Phaeosphaeriaceae | |
| OTU52827 | -0.261 | 0.13 | Pleosporales | Pleosporales | |
| OTU54100 | -0.259 | 0.14 | Xylariales | Xylariales | |
| OTU66654 | -0.254 | 0.11 | unidentified | unidentified | |
| OTU15695 | -0.254 | 0.12 | Agaricales | *Hypholoma brunneum* | |
| OTU52841 | -0.252 | 0.12 | Xylariales | Apiosporaceae | |
| OTU53951 | -0.252 | 0.11 | unidentified | unidentified | |
| OTU29409 | -0.251 | 0.12 | Hypocreales | unidentified | |
| OTU25892 | -0.245 | 0.12 | unidentified | unidentified | |
| OTU31221 | -0.244 | 0.09 | Chaetothyriales | Trichomeriaceae | |
| OTU58722 | -0.243 | 0.09 | unidentified | Lecanoromycetes | |
| OTU61826 | -0.243 | 0.11 | unidentified | unidentified | |
| OTU26149 | -0.242 | 0.08 | Xylariales | *Fusidium* | |
| OTU67650 | -0.241 | 0.12 | unidentified | unidentified | |
| OTU28356 | -0.24 | 0.10 | unidentified | Trichomeriaceae | |
| OTU25135 | -0.233 | 0.11 | Tremellales | *Papiliotrema* | |
| OTU67403 | -0.230 | 0.09 | Tremellales | *Bulleribasidium* | |
| OTU42888 | -0.226 | 0.10 | Chaetothyriales | Trichomeriaceae | |
| OTU57217 | -0.225 | 0.08 | Pleosporales | Pleosporales | |
| OTU34593 | -0.224 | 0.11 | unidentified | Trichomeriaceae | |
| OTU18201 | -0.223 | 0.11 | Agaricales | *Psathyrella* | |
| OTU52567 | -0.222 | 0.10 | Sordariales | Sordariales | |
| OTU37689 | -0.221 | 0.11 | Chaetothyriales | Chaetothyriaceae | |
| OTU49734 | -0.219 | 0.09 | unidentified | Didymellaceae | |
| OTU31514 | -0.218 | 0.10 | Chaetothyriales | Chaetothyriales | |
| OTU53670 | -0.215 | 0.10 | Trichosphaeriales | *Nigrospora* | |
| OTU67095 | -0.21 | 0.11 | Tremellales | *Hannaella* | |
| OTU38294 | -0.206 | 0.09 | unidentified | unidentified | |
| OTU47997 | -0.205 | 0.09 | Pleosporales | unidentified | |
| OTU28297 | -0.203 | 0.10 | Tremellales | *Trimorphomyces* | |
| OTU67241 | -0.202 | 0.08 | unidentified | unidentified | |
| OTU53802 | -0.201 | 0.09 | Pleosporales | *Paraconiothyrium* | |
| OTU51250 | -0.192 | 0.10 | unidentified | unidentified | |
| OTU41050 | -0.191 | 0.09 | unidentified | Dothideomycetes | |
| OTU58024 | -0.190 | 0.09 | Capnodiales | *Cladosporium* | |
| OTU34069 | -0.185 | 0.05 | Glomerellales | *Plectosphaerella* | |
| OTU47014 | -0.182 | 0.10 | unidentified | unidentified | |
| OTU60016 | -0.181 | 0.10 | Pleosporales | *Leptospora* | |
| OTU47966 | -0.179 | 0.09 | Diaporthales | Diaporthaceae | |
| OTU34318 | -0.17 | 0.08 | Chaetothyriales | Trichomeriaceae | |
| OTU67154 | -0.163 | 0.08 | Tremellales | *Hannaella* | |
| OTU25868 | -0.157 | 0.06 | Xylariales | *Fusidium* | |
| OTU9668 | -0.155 | 0.07 | Agaricales | *Coprinellus*. | |
| OTU44265 | -0.152 | 0.08 | unidentified | Phyllostictaceae | |
| OTU60045 | -0.152 | 0.07 | Helotiales | *Tetracladium* | |
| OTU21838 | -0.148 | 0.08 | Agaricales | Strophariaceae | |

**Table S5.** Sampling effort for assessment of pathogen damage and characterization of fungal communities in leaves of 27 host plant species ranked by their phylogenetic relatedness to coffee (*Coffea arabica* L.). at each of the eight field sites (each abbreviation denotes a site). DNA extracts from the same host species within a distance at a site were pooled prior to molecular characterization of fungal communities, Phylogenetic distance from coffee (Pdist) was determined using GenBank® accessions spanning the 18S, ITS1, 5.8S, ITS2 and 26S regions of DNA; for plant species lacking sequence data, the nearest relative (indicated in parentheses) with relevant available data was substituted. *Virola sebifera* leaves inhibited DNA amplification, resulting in no viable molecular samples Fungal communities were characterized via ITS2 metabarcoding using the fungal-specific primers ITS4 (White et al., 1990) and 5.8SR (Vilgalys & Hester, 1990).

| **Plant family** | **Plant species** | **Pooled DNA samples** | **Number of leaves sampled per site** | | | | | | | | **Pdist** | | **Accession #** |
| --- | --- | --- | --- | --- | --- | --- | --- | --- | --- | --- | --- | --- | --- |
| **AJ** | **AN** | **DV** | **EP** | **LR** | **RB** | **RN** | **VP** |  |  | |
| Rubiaceae | *Coffea arabica* | 30 | 16 | 16 | 20 | 16 | 16 | 15 | 16 | 16 | 0 | KP776613.1 | |
| *Psychotria limonensis* | 2 | - | 4 | - | - | - | 4 | - | - | 0.354 | AF072052.1 | |
| *Palicourea lasiorrhachis* | 1 | - | - | - | 1 | - | - | - | - | 0.372 | AF072009.1 | |
| *Palicourea aurantiibractea* (*Pa. lasiorrhachis*) | 7 | - | - | 2 | - | 4 | - | - | 10 | 0.372 | AF072009.1 | |
| *Palicourea hebeclada* | 8 | - | - | 9 | - | - | 12 | 8 | 1 | 0.373 | AF071997.1 | |
| *Notopleura uliginosa* | 8 | - | - | - | - | 11 | 8 | - | 3 | 0.384 | AF071991.1 | |
| *Palicourea tomentosa* | 24 | 12 | 12 | 18 | - | 9 | 12 | 16 | 20 | 0.391 | AF071993.1 | |
| *Psychotria marginata* | 7 | - | 1 | - | 16 | - | 17 | - | - | 0.393 | AF072049.1 | |
| *Rudgea cornifolia* (*R. stipulacea*) | 8 | - | - | - | 12 | - | 8 | 12 | - | 0.394 | JX155099.1 | |
| *Palicourea elata* | 22 | 16 | 16 | 20 | 3 | 16 | - | 4 | 20 | 0.394 | KC480541.1 | |
| *Psychotria panamensis* | 9 | 5 | 17 | - | 4 | - | - | 5 | - | 0.397 | FJ208641.1 | |
| *Psychotria deflexa* | 2 | - | - | 9 | - | - | - | - | - | 0.401 | AF149377.1 | |
| *Psychotria pilosa* | 7 | 12 | - | - | - | 8 | - | - | 9 | 0.401 | AF149398.1 | |
| *Palicourea berteroana* | 4 | - | - | - | 16 | - | - | - | - | 0.406 | AF072003.1 | |
| *Psychotria hispidula* (*Ps. ostreophora*) | 1 | 1 | - | - | - | - | - | - | - | 0.413 | KJ804930.1 | |
| *Palicourea microbotrys* | 9 | 5 | - | 6 | - | 6 | - | - | 2 | 0.423 | KC480544.1 | |
| *Palicourea brachiata* | 3 | 2 | - | - | - | - | 8 | - | - | 0.448 | AF072001.1 | |
| Fagaceae | *Quercus insignis* | 2 | - | - | - | - | 8 | - | - | - | 0.464 | AY040487.1 | |
| Primulaceae | *Ardisia opegrapha* | 28 | 16 | 17 | 20 | 16 | 12 | 15 | 16 | 19 | 0.467 | JF416239.1 | |
| Sapindaceae | *Paullinia bracteosa* | 15 | 4 | 5 | 14 | 16 | - | 12 | 16 | - | 0.520 | MZ892285.1 | |
| Burseraceae | *Protium ravenii* | 1 | - | - | - | - | - | 4 | - | - | 0.522 | KJ503448.1 | |
| Lauraceae | *Ocotea atirrensis* | 4 | - | - | - | 16 | - | - | - | - | 0.532 | MF110071.1 | |
| Melastomataceae | *Miconia nutans* | 1 | - | - | - | - | 4 | - | - | - | 0.555 | KF821665.1 | |
| Myristicaceae | *Otoba novogranatensis* (*Horsfieldia kingii*) | 4 | - | - | - | - | 11 | 3 | - | - | 0.616 | MW044396.1 | |
|  |  |  |  |  |  |  |  |  |  |  |  |  | |
| Melastomataceae | *Miconia punctata* | 14 | 12 | 14 | - | - | 8 | 12 | - | 20 | 0.620 | EU055821.1 | |
| Myristicaceae | *Virola sebifera* | - | 12 | - | 5 | - | 4 | - | - | 20 | - | - | |

| **Model** | **term** | **estimate** | **std.error** | **statistic** | **p.value** |
| --- | --- | --- | --- | --- | --- |
| **All distances** | **dist** | **-0.01** | **0.003** | **-3.85** | **0.0001** |
| Excluding -50 m | dist | -0.01 | 0.003 | -3.30 | 0.0009 |
| Forest and -0.1 | dist | -0.008 | 0.003 | -2.56 | 0.0106 |
| Forest Only | dist | -0.007 | 0.003 | -2.212 | 0.0272 |

**Table S6.** Alternate betabinomial models for airborne samplers with various subsets of the sampling distances show concordant trend of decline of pleosporales with distance from the coffee field.Bolded model is the complete dataset included in the main text.
